# Supplementary material
Source: PubMed Central journal article supplement (PMC4335910)
Supplement: AAC.03242-14_zac002153662so1.pdf [file AAC.03242-14_zac002153662so1.pdf]

## Supplementary Materials

### Supplementary Material S1 – 16S rRNA gene and rMLST phylogenetic analysis

#### Methods

Phylogenetic comparison was performed using 1378 bps of the 16S rRNA gene. For Pakistan isolates, the 16S rRNA gene sequences were obtained by sequencing PCR amplicons and from illumina whole genome sequence (WGS) data for CHI-40-1. CHI-40-1 was also analysed by ribosomal MLST (1). Loci were identified from WGS contigs by comparison with loci from *Acinetobacter johnsonii* deposited in the rMLST database at <http://rmlst.org/>. Loci were also identified, extracted and concatenated for the remaining 15 *Acinetobacter* spp. sequences currently in the rMLST database, additional *Acinetobacter* spp. WGS available in GenBank, *Moraxella catarrhalis* RH4 and *Psychrobacter arcticus* 273-4. All phylogenetic trees were built by aligning sequences of interest using the MUSCLE alignment tool(2) at <http://www.ebi.ac.uk/Tools/msa/muscle/>. Phylogenetic trees were built using phyML 3.0,(3) with 100 replicate bootstraps.

#### Figure S1 – Phylogenetic trees of *Acinetobacter* spp. a) Based on 1378 bps of the 16S rRNA gene; b) Based on 53 rMLST loci.

Performed with 100 bootstraps. Only bootstrap values of < 70 are shown. Isolates with a solid underline are *bla*<sub>N<sub>DM</sub>-1</sub> *Acinetobacter* spp. characterised for this study. Isolates with a dotted underline are *bla*<sub>N<sub>DM</sub>-1</sub> *Acinetobacter* spp. for which whole genome sequences are publically available from the NCBI database. All other sequences are from *Acinetobacter* spp. isolates which do not harbour *bla*<sub>N<sub>DM</sub>-1</sub> available from NCBI nucleotide, draft genome or complete genome databases or in the rMLST database.

a) based on 1378 bps of the 16S rRNA gene.

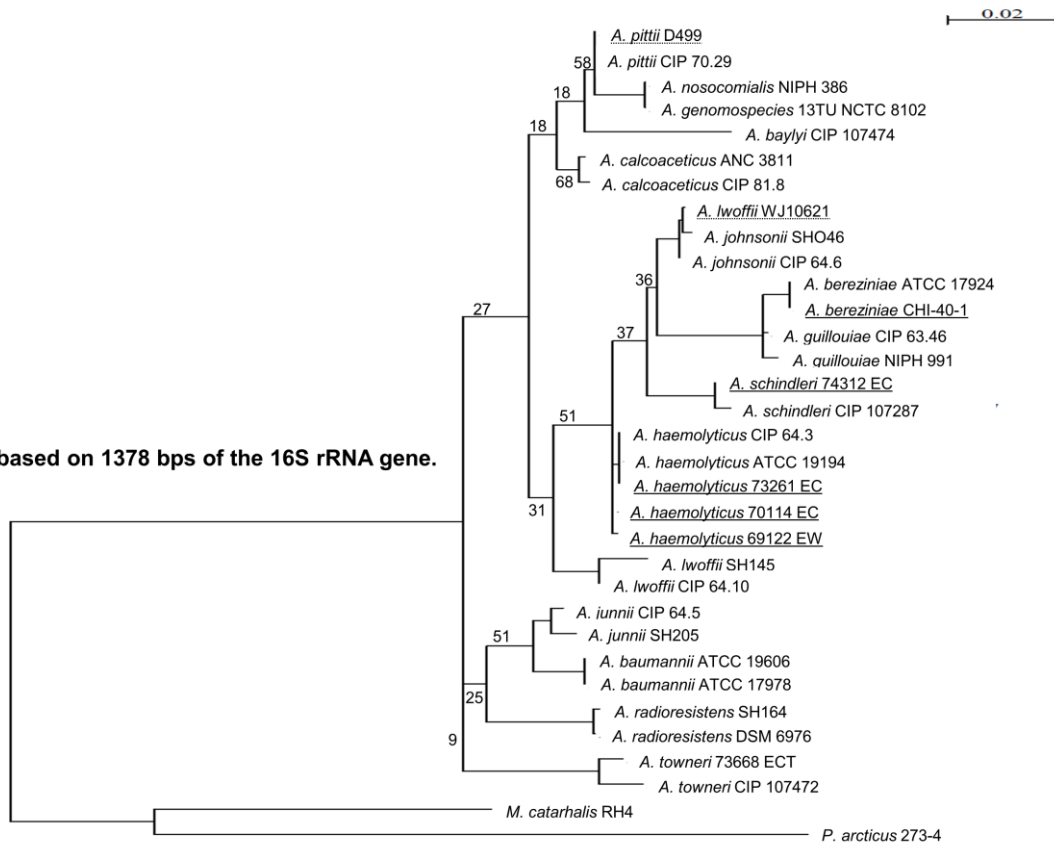

b) based on 53 rMLST loci

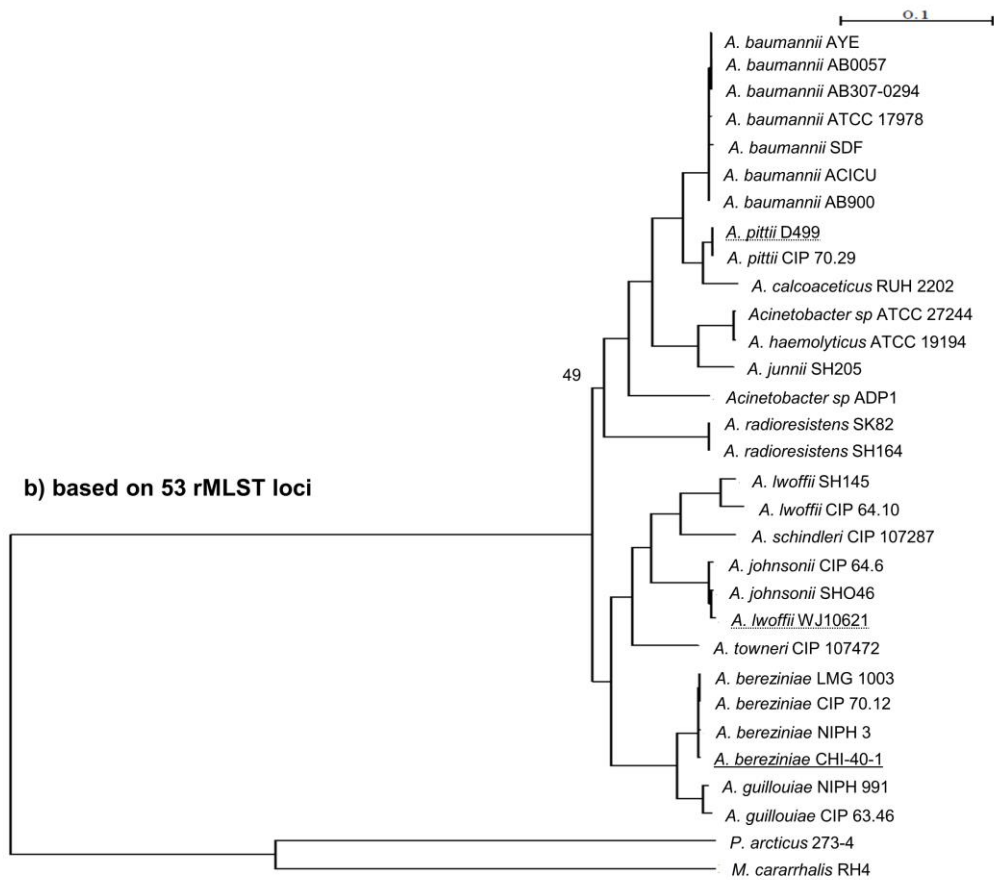

## Supplementary Material S2 – PCR conditions and primers.

### PCR conditions

All primers used for PCR and sequencing are listed in Table S2. Standard PCR reactions were performed on a G-Storm GS1 Thermal Cycler (G-storm, Somerton, UK). PCRs used for sequence closure and screening for the presence of pNDM-BJ01-like plasmids were performed using the conditions 95 °C for 5 min, then 35 cycles of 95 °C for 1 min, 55 °C for 1 min and 68 °C for 1 min per kb of expected product size, followed by 68 °C for 5min. All PCRs used as template 1 µL of genomic DNA prepared using the Wizard® Genomic DNA Purification Kit (Promega, Madison USA). PCR mastermixes were composed of 12.5 µL of ReddyMix Extensor PCR Master Mix 1 (Thermo Scientific), 1.25 µL of each primer and 9 µL of molecular grade water. After separation by electrophoresis and ethidium bromide staining, bands were purified using the QIAquick Gel Extraction Kit, (Qiagen, Limburg, Netherlands) as per manufacturer's instructions.

### Real-time quantitative PCR

PCRs were optimised for annealing temperature (50-70 °C), MgCl<sub>2</sub> concentration (2-5 mM), primer concentration (0.25-0.75 µM) and probe concentration (0.2-0.4 µM). qPCR for *bla*<sub>NDM-1</sub> and *traA* were run as duplex reactions at 95 °C for 15 min, then 35 cycles of 95 °C for 10 s and 60 °C for 30 s. The qPCR for the *rpoB* references was different for each strain background. For CHI-40-1 and AG3528<sub>NDMP1</sub> the same primer pair was used (*rpoB* Ac F1 and *rpoB* Ac R1) but the probes differed (*rpoB* 40-1 and *rpoB* AG3, respectively). For UAB190<sub>NDMP2</sub> passaged isolates the primers *rpoB* Ac F3 and *rpoB* Ac R3 were used with probe *rpoB* Ec. All *rpoB* qPCR runs were performed using the conditions 95 °C for 15 min, then 40 cycles of 95 °C for 10 s and 58 °C for 30 s. All qPCR reactions were performed on Rotorgene Q HRM (Qiagen, Manchester, UK) with a final volume of 20 µL, with 2 µL of Lightcycler FastStart DNA Master HybProbe (Roche, Penzberg, Germany) and 5 µL of template. Final concentrations of primers, probes and MgCl<sub>2</sub> were as indicated in Table S2.

**Table S2 – List of primers and probes used for PCR and sequencing of PCR products**

| Primer       | Sequence               | Use                                                    | Primer/ probe conc. ( $\mu\text{M}$ ) | $\text{Mg}^{2+}$ conc. (mM) |
|--------------|------------------------|--------------------------------------------------------|---------------------------------------|-----------------------------|
| 27F(4)       | AGAGTTTTGATCCTGGCTCAG  | PCR and sequencing of 16sRNA locus                     | 0.2                                   | 2.25                        |
| 1492R(4)     | GGTTACCTTGTTACGACTT    | PCR and sequencing of 16sRNA locus                     | 0.2                                   | 2.25                        |
| 800R(5)      | CTACCAGGGTATCTAAT      | Sequencing 16s rRNA locus                              | 0.2                                   | 2.25                        |
| ndm-1F(6)    | GAAGCTGAGCACCGCATTAG   | <i>bla</i> <sub>NDM-1</sub> detection and sequencing   | 0.2                                   | 2.25                        |
| ndm-1R(6)    | TGCGGGCCGTATGAGTGATT   | <i>bla</i> <sub>NDM-1</sub> detection and sequencing   | 0.2                                   | 2.25                        |
| aphA6-5F     | AATTGGTCAGTCGCCATCGG   | PCR and sequencing <i>bla</i> <sub>NDM-1</sub> context | 0.2                                   | 2.25                        |
| IS125-5R     | TGTGACCACGTCTACGTCTAGC | PCR and sequencing <i>bla</i> <sub>NDM-1</sub> context | 0.2                                   | 2.25                        |
| IS125gapF    | GCAAAGGCAGAATCAGTGCG   | PCR and sequencing <i>bla</i> <sub>NDM-1</sub> context | 0.2                                   | 2.25                        |
| NDM_5R       | CTCAGCTTCGCGACCGGGTG   | PCR and sequencing <i>bla</i> <sub>NDM-1</sub> context | 0.2                                   | 2.25                        |
| ndm-p1       | CAGTTGCGGAGCTTTGAAGC   | PCR and sequencing <i>bla</i> <sub>NDM-1</sub> context | 0.2                                   | 2.25                        |
| ndm-3f       | GCCATTCCGCCCCCGATAGC   | PCR and sequencing <i>bla</i> <sub>NDM-1</sub> context | 0.2                                   | 2.25                        |
| trpF-R       | CACGGCAAGGCACCGCGATA   | PCR and sequencing <i>bla</i> <sub>NDM-1</sub> context | 0.2                                   | 2.25                        |
| tat-3R       | GGCACCGCACCTCGGTCAAG   | PCR and sequencing <i>bla</i> <sub>NDM-1</sub> context | 0.2                                   | 2.25                        |
| tat-gapR1    | GTACCAGGGCTGCGCCGATG   | PCR and sequencing <i>bla</i> <sub>NDM-1</sub> context | 0.2                                   | 2.25                        |
| groEL-5F2    | GCGCAGGCGATGGACAAGGT   | PCR and sequencing <i>bla</i> <sub>NDM-1</sub> context | 0.2                                   | 2.25                        |
| groEL-MR     | GCCTTCACCGCGCAGACCTT   | PCR and sequencing <i>bla</i> <sub>NDM-1</sub> context | 0.2                                   | 2.25                        |
| ISCR27-gap2F | GGCAAGGTCGGCGGCTTCTC   | PCR and sequencing <i>bla</i> <sub>NDM-1</sub> context | 0.2                                   | 2.25                        |
| ISCR27-gap2R | ATTGCGCCACGGCGTCTTGA   | PCR and sequencing <i>bla</i> <sub>NDM-1</sub> context | 0.2                                   | 2.25                        |
| resF         | AAAGACTGCCAAACGCCCTG   | PCR and sequencing <i>bla</i> <sub>NDM-1</sub> context | 0.2                                   | 2.25                        |
| PN2F(7)      | TAGATTCGATTCACGGCATA   | PCR and sequencing <i>bla</i> <sub>NDM-1</sub> context | 0.2                                   | 2.25                        |
| PN5R(7)      | CGTCTTTGTAGCCTTTATCTC  | PCR and sequencing <i>bla</i> <sub>NDM-1</sub> context | 0.2                                   | 2.25                        |
| ble3F        | CATGGTGGCATTGGTGAACGC  | PCR and sequencing <i>bla</i> <sub>NDM-1</sub> context | 0.2                                   | 2.25                        |

| Primer       | Sequence                      | Use                                                    | Primer/ probe conc. ( $\mu\text{M}$ ) | Mg <sup>2+</sup> conc. (mM) |
|--------------|-------------------------------|--------------------------------------------------------|---------------------------------------|-----------------------------|
| res3F        | TGCAAAACAAATTAACGCCAGTCTGA    | PCR and sequencing <i>bla</i> <sub>NDM-1</sub> context | 0.2                                   | 2.25                        |
| res-gapR     | AGAAGGCGAGGATGAGGGACT         | PCR and sequencing <i>bla</i> <sub>NDM-1</sub> context | 0.2                                   | 2.25                        |
| ISAbalike-FF | GCCAGTAACCATACGTAAAGAAAGACG   | PCR and sequencing <i>bla</i> <sub>NDM-1</sub> context | 0.2                                   | 2.25                        |
| ISAbalike-RR | ATGCAACAAAGCCGTCGGGA          | PCR and sequencing <i>bla</i> <sub>NDM-1</sub> context | 0.2                                   | 2.25                        |
| 69122gapF    | TGGTGATATAAAAACGGCGAATTCAAACA | PCR and sequencing <i>bla</i> <sub>NDM-1</sub> context | 0.2                                   | 2.25                        |
| 45c143R      | ACGCTCCGCCATAATCGTTC          | PCR and sequencing <i>bla</i> <sub>NDM-1</sub> context | 0.2                                   | 2.25                        |
| IS125 3R     | CGCATGTGCCTTTTGGCAGGG         | PCR and sequencing <i>bla</i> <sub>NDM-1</sub> context | 0.2                                   | 2.25                        |
| aphA6-3R     | TCAGCATTAAAAACCCCGCAA         | PCR and sequencing <i>bla</i> <sub>NDM-1</sub> context | 0.2                                   | 2.25                        |
| aphA6-5R     | AGTCATGATGAGTTCAGGCACC        | PCR and sequencing <i>bla</i> <sub>NDM-1</sub> context | 0.2                                   | 2.25                        |
| 5PgapF1      | TCAGCACTCAATTCAGCAAGTGT       | PCR and sequencing <i>bla</i> <sub>NDM-1</sub> context | 0.2                                   | 2.25                        |
| 5PgapF4      | GTTGGTGGGTTGGTGTCTGT          | PCR and sequencing <i>bla</i> <sub>NDM-1</sub> context | 0.2                                   | 2.25                        |
| 5PgapF5      | TCTGCCCCCATCAAACGTG           | PCR and sequencing <i>bla</i> <sub>NDM-1</sub> context | 0.2                                   | 2.25                        |
| 5PgapR1      | TAAACCGCCACCAACCGAAC          | PCR and sequencing <i>bla</i> <sub>NDM-1</sub> context | 0.2                                   | 2.25                        |
| 5PgapR3      | TGGGACTTTTGGATTTGCCGA         | PCR and sequencing <i>bla</i> <sub>NDM-1</sub> context | 0.2                                   | 2.25                        |
| orfA F       | ACTGGGCCGCTTCAACCACA          | Gap closure pNDM-40-1                                  | 0.2                                   | 2.25                        |
| p40-1gap1 F  | ACGCTTCCACGTTGCCCTGA          | Gap closure pNDM-40-1                                  | 0.2                                   | 2.25                        |
| p40-1gap2F   | TGCGGTTCTGCGGTCAGCTC          | Gap closure pNDM-40-1                                  | 0.2                                   | 2.25                        |
| p40-1gap3F   | TCAGAGCGACACCGCACGAA          | Gap closure pNDM-40-1                                  | 0.2                                   | 2.25                        |
| p40-1gap4F   | ACGGGGGAGTATGGGAACT           | Gap closure pNDM-40-1                                  | 0.2                                   | 2.25                        |
| p40-1gap5F   | CTTGTAAGGAATGTTGGCAGGGT       | Gap closure pNDM-40-1                                  | 0.2                                   | 2.25                        |
| AphA6gap5R   | AGTCATGATGAGTTCAGGCACC        | Gap closure pNDM-40-1                                  | 0.2                                   | 2.25                        |
| p40-1gap2R   | TTCGTGCGGTGTCGCTCTGA          | Gap closure pNDM-40-1                                  | 0.2                                   | 2.25                        |
| p40-1gap3R   | TCCATACTCCCCGTCATAGC          | Gap closure pNDM-40-1                                  | 0.2                                   | 2.25                        |
| p40-1gap5R   | AGGTACGCCAACGAAACAGC          | Gap closure pNDM-40-1                                  | 0.2                                   | 2.25                        |
| PN11F(7)     | AATGTGGTCTGCGGTGTA            | Detection of pNDM-BJ01-like plasmids                   | 0.2                                   | 2.25                        |
| PN11R(7)     | GCCTGCTGTAACCTCTCAA           | Detection of pNDM-BJ01-like plasmids                   | 0.2                                   | 2.25                        |
| PN6F(7)      | TCAGGATTCACCCACCAT            | Detection of pNDM-BJ01-like plasmids                   | 0.2                                   | 2.25                        |
| PN6R(7)      | GGCTCAAGACTACAACGATA          | Detection of pNDM-BJ01-like plasmids                   | 0.2                                   | 2.25                        |

| Primer          | Sequence                        | Use                                          | Primer/ probe conc. ( $\mu\text{M}$ ) | Mg <sup>2+</sup> conc. (mM)  |
|-----------------|---------------------------------|----------------------------------------------|---------------------------------------|------------------------------|
| PN9F(7)         | ATCTACGATCTTGCCTTGTT            | Detection of pNDM-BJ01-like plasmids         | 0.2                                   | 2.25                         |
| PN9R(7)         | CTTGTTCTGACGAGCCTAA             | Detection of pNDM-BJ01-like plasmids         | 0.2                                   | 2.25                         |
| TraA F1         | TGGTCAGCAAAACCCGCATGT           | TraA quantification by qPCR                  | 0.5                                   | 4                            |
| TraA R3         | GGTTAGCCCATTCTAGGCGGGT          | TraA quantification by qPCR                  | 0.5                                   | 4                            |
| Tra Probe       | TCCAGTAAACCCTGAAAAGGGCGGTGCGGGT | TraA quantification by qPCR                  | 0.2                                   | 4                            |
| NDM RT F1       | TGGGTGGAACCAGCAACCGC            | NDM quantification by qPCR                   | 0.25                                  | 4                            |
| ndm RT R1       | TGCCGAGCGACTTGCCCTTG            | NDM quantification by qPCR                   | 0.25                                  | 4                            |
| NDM probe       | ACCCCGGCCCGGCCACACCAGT          | NDM quantification by qPCR                   | 0.2                                   | 4                            |
| rpoB Ac RT F1   | ATGGCATACTCATATACCGA            | <i>Acinetobacter</i> rpoB reference for qPCR | 0.75 (40-1 probe) 0.5 (AG3 probe)     | 3 (40-1 probe) 4 (AG3 probe) |
| rpoB Ac RT R1   | TGGAGACCGATATCTTCGCG            | <i>Acinetobacter</i> rpoB reference for qPCR | 0.75 (40-1 probe) 0.5(AG3 probe)      | 3 (40-1 probe) 4 (AG3 probe) |
| rpoB 40-1 probe | TGCCCCAAGTCATGCATGCTCCGTA CTTCG | <i>A. bereziniae</i> rpoB reference for qPCR | 0.2                                   | 3                            |
| RpoB AG3 probe  | TGCCCCAAGTAATGGATGCACCGTACTTAC  | <i>A. pittii</i> rpoB reference for qPCR     | 0.2                                   | 4                            |
| rpoB Ec F3      | TCCTTTCTATCCAGCTTGACTCGT        | <i>E. coli</i> rpoB reference for qPCR       | 0.25                                  | 4                            |
| rpoB Ec R3      | CGCAGTTTAACGCGCAGCGG            | <i>E. coli</i> rpoB reference for qPCR       | 0.25                                  | 4                            |
| RpoB Ec Probe   | ACGTCAGCTACCGCCTTGCGAACCGGTGT   | <i>E. coli</i> rpoB reference for qPCR       | 0.2                                   | 4                            |

### Supplementary Material S3 – pNDM-BJ01-like plasmids and related sequences.

**Table S3 – Strain details and sequence differences for fully sequenced or published reports of pNDM-BJ01-like plasmids.**

| Species/ strain                 | Plasmid            | Accession No.  | Backbone compared to pNDM-BJ01                                                              | Resistance region compared to pNDM-BJ01                                                                                                                        | Country of isolation | Travel History  | Reference No. |
|---------------------------------|--------------------|----------------|---------------------------------------------------------------------------------------------|----------------------------------------------------------------------------------------------------------------------------------------------------------------|----------------------|-----------------|---------------|
| <i>A. lwoffii</i> WJ10621       | pNDM-BJ01          | JQ001791       | NA                                                                                          | NA                                                                                                                                                             | China                |                 | 7             |
| <i>A. bereziniae</i> CHI-40-1   | pNDM-40-1          | KF702385       | Identical                                                                                   | 17,688C>T, 17,760T>C in 3' IS <i>Aba125</i> , 10,121_11,420del including 3' end of <i>ble</i> to 5' end of <i>tat</i> , 15,761_15,912del within ISCR27.        | India                |                 | This work     |
| <i>A. calcoaceticus</i> XM1570  | pXM1               | AMXH01000087   | Identical                                                                                   | 17,688C>T, 17,760T>C in 3' IS <i>Aba125</i> .                                                                                                                  | China                |                 | 8             |
| <i>A. lwoffii</i> WJ10659       | pNDM-BJ02          | JQ060896       | Identical                                                                                   | 16,859_17,969del including most of 3' IS <i>Aba125</i> , excluding only 3' 18 bp.                                                                              | China                |                 | 7             |
| <i>A. baumannii</i> GF216       | pNDM-AB            | KC503911       | 47,274_1ins – 3,530bp long containing part of <i>traD</i> , <i>insB</i> , methyltransferase | 12,036-18,237 from <i>cutA</i> to 3' IS <i>Aba125</i> replaced by sequence including <i>msr</i> (E) and <i>mph</i> (E).                                        | China                |                 | 9             |
| <i>A. pittii</i> D499           | <i>pAB_D499</i>    | AGFH01000030   | 32,541T>A in <i>virB10</i> , 46,541_46,712del.                                              | 8,364A>G in 5' IS <i>Aba125</i> , 10,531C>G in <i>trpF</i> , 16,866-18,101 containing 3' IS <i>Aba125</i> , IS <i>Aba11</i> -like insertion 3' end, 18,123T>A. | China                |                 | 10            |
| <i>A. baumannii</i> ZW85-1      | pAbNDM-1           | JN377410       | Identical                                                                                   | 17,132A>G, 17,151T>C, 17,154T>C, 17,340C>A, 17,688C>T, 17,760T>C and 17,984_17,985insCC in 3' IS <i>Aba125</i> .                                               | China                |                 | -             |
| <i>Acinetobacter</i> sp. M131   | pM131_NDM-1        | JX072963       | 47,200T>C in hypothetical protein coding sequence.                                          | 16,866-18,101 containing 3' IS <i>Aba125</i> , IS <i>Aba11</i> -like insertion 3' end.                                                                         |                      |                 | -             |
| <i>A. lwoffii</i> lz4b          | pNDM-lz4b          | KJ547696       | 504G>A in <i>traA</i> , 31,694T>G in <i>virB11</i> , 40,341_40,342insC, 43,781_44,487del    | 8,328A>C in 5' IS <i>Aba125</i> , 17,688C>T and 17,760T>C in 3' IS <i>Aba125</i> .                                                                             |                      |                 | -             |
| <i>A. soli</i> TCM341           | Unnamed (contig 5) | JAPY01000005   | 20,767G>T and 20,977_21,019del in putative zeta-toxin coding sequence.                      | 8,174A>G in 5' IS <i>Aba125</i> , 16,859_17,969del including most of 3' IS <i>Aba125</i> , excluding only 3' 18 bp.                                            |                      |                 | -             |
| <i>A. schindleri</i> MRSN 10319 | Unnamed            | Not applicable | > 99.9% identity                                                                            | Unclear from report                                                                                                                                            | USA                  | Afghanistan     | 11            |
| <i>A. pittii</i> 2012276        | Unnamed            | Not applicable | Similar based on partial sequencing                                                         | Full Tn125 as in JQ001791                                                                                                                                      | Belgium              | India and Egypt | 12            |

**Figure S3 – Gene maps of complete sequence of pNDM-BJ01 and related plasmids.**

Colour codes and abbreviations as in main text Figure 2. The putative plasmid replicase, *repB*, in pWCA157-71 is lime green. Dark blue and red lines mark the boundaries between *A. ursingii* NIPH 706 contigs. Percentages above genes represent degree of amino-acid sequence identity of translated protein sequences in pNDM-40-1, based on MUSCLE alignments. Percentages are not shown for pNDM-AB as all amino-acid sequences are 99-100% similar.

***A. lwoffii* pNDM-BJ01 (JQ001791)**

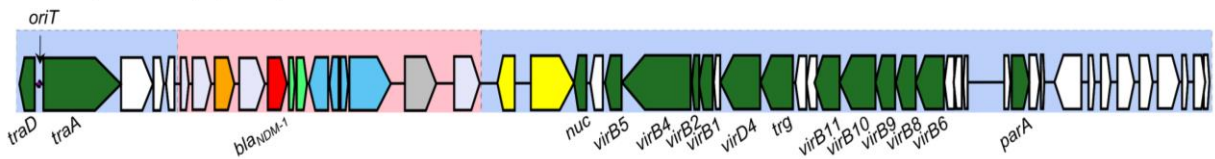

***A. ursingii* NIPH 706 (APQB00000000.1)**

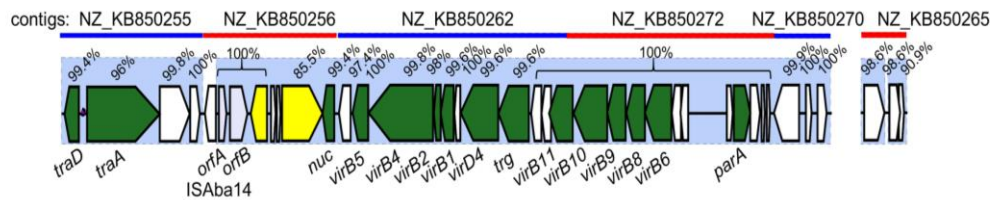

***Acinetobacter* sp. NIPH 2168 (APRW01000001.1)**

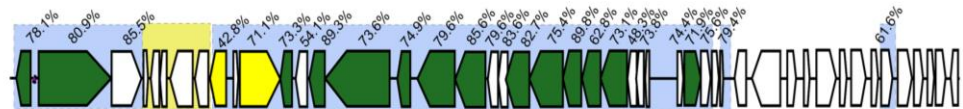

**pWCA157-71 *A. radioresistens* (ALIR01000019.1)**

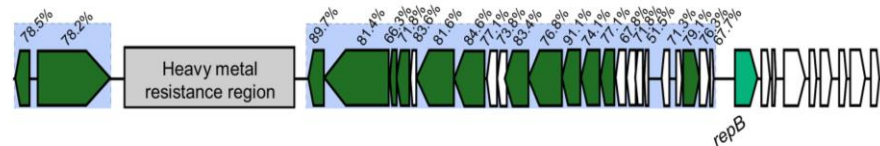



**Supplementary Material Figure S4 – Pulsed field gels of S1 digested genomic DNA from passaged isolates and in gel hybridisation with *bla*<sub>NDM-1</sub> gene probe.**  
**a) Pulsed field gel of CHI-40-1 and AG3528<sub>NDMP1</sub> at start of passage (D0) and after 14 day passage without antibiotics (D14N) and with meropenem (D14M);**  
**b) in gel hybridisation of a);** c) Pulsed field gel of UAB190<sub>NDMP2</sub> at D0, D14N and D14M; d) in gel hybridisation of b).

1 -  $\lambda$  concatamer (~50-1000kb); 2 – CHI-40-1 D0; 3 – CHI-40-1 D14N; 4 – CHI-40-1 D14M; 5 - AG3528<sub>NDMP1</sub> D0; 6 - AG3528<sub>NDMP1</sub> D14N; 7 - AG3528<sub>NDMP1</sub> D14M; 8 –  $\lambda$ ; 9 – UAB190<sub>NDMP2</sub> D0; 10 – UAB190<sub>NDMP2</sub> D14N; 11 – UAB190<sub>DMP2</sub> D14M

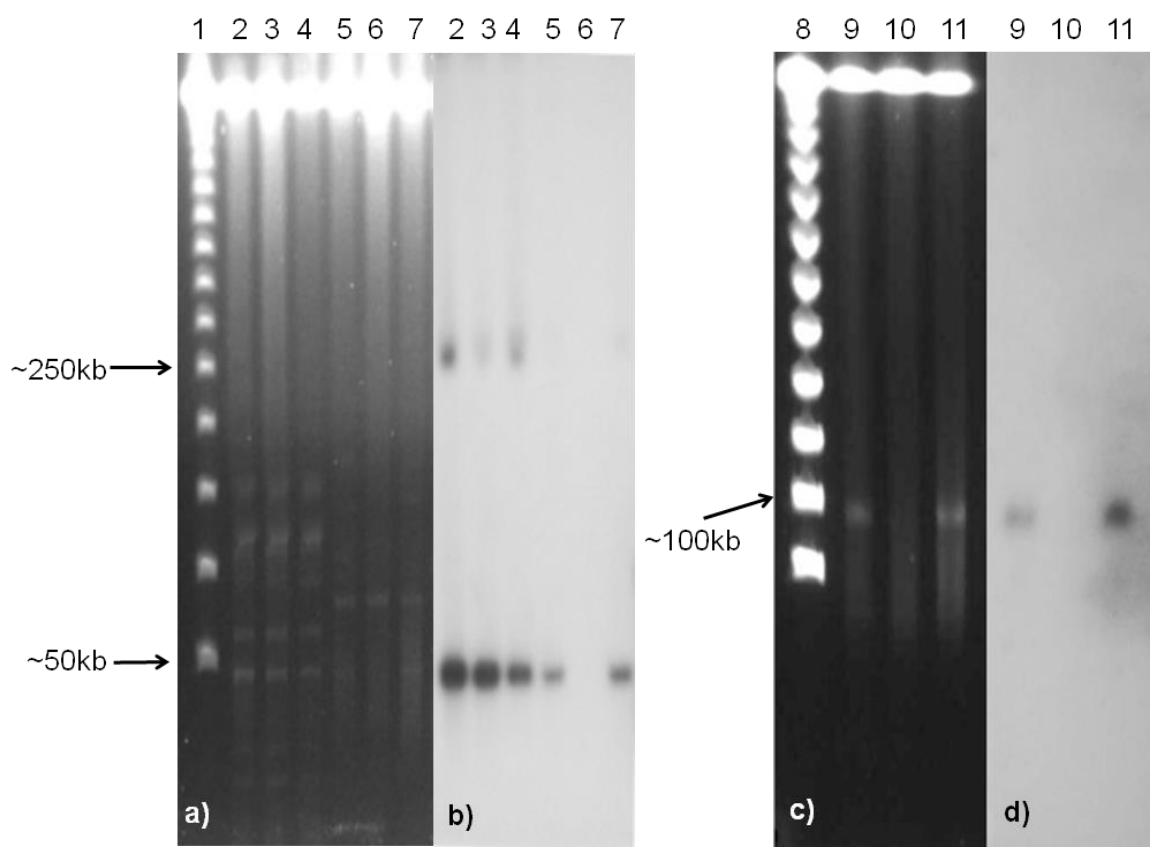

**Supplementary Material Figure S5 – Estimated quantity of *bla*<sub>NDM-1</sub> gene present relative to *rpoB* gene over the course of the passage experiment with meropenem selection versus no antibiotic selection by  $\Delta\Delta CT$  method. Results are shown for a) the *bla*<sub>NDM-1</sub> positive donor strain CHI-40-1 and transconjugants b) UAB190<sub>NDMP2</sub> and c) AG3528<sub>NDMP1</sub>. Note that a positive slope indicates a fall in quantity of *bla*<sub>NDM-1</sub> gene detected relative to reference in the absence of antibiotic selection. Results based on means of three replicate real time PCRs, error bars show 2 standard deviations.**

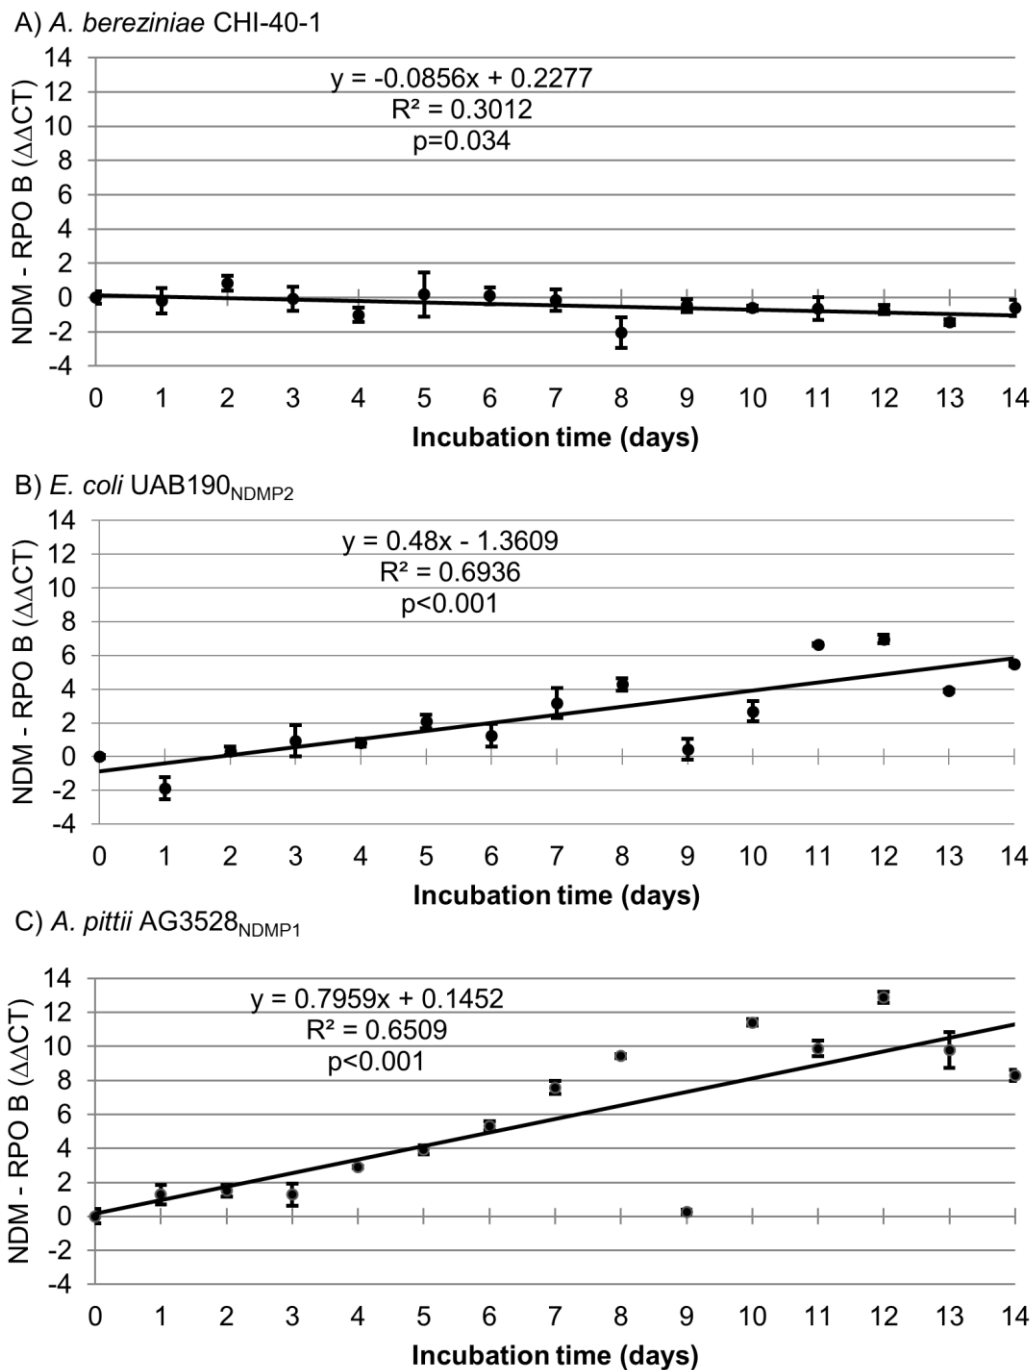

## References

1. **Jolley KA, Bliss CM, Bennett JS, Bratcher HB, Brehony C, Colles FM, Wimalarathna H, Harrison OB, Sheppard SK, Cody AJ, Maiden MC.** 2012. Ribosomal multilocus sequence typing: universal characterization of bacteria from domain to strain. *Microbiology* **158**:1005-1015.
2. **Edgar RC.** 2004. MUSCLE: multiple sequence alignment with high accuracy and high throughput. *Nucleic acids research* **32**:1792-1797.
3. **Guindon S, Dufayard JF, Lefort V, Anisimova M, Hordijk W, Gascuel O.** 2010. New algorithms and methods to estimate maximum-likelihood phylogenies: assessing the performance of PhyML 3.0. *Systematic biology* **59**:307-321.
4. **Henriques IS, Fonseca F, Alves A, Saavedra MJ, Correia A.** 2006. Occurrence and diversity of integrons and beta-lactamase genes among ampicillin-resistant isolates from estuarine waters. *Res Microbiol* **157**:938-947.
5. **Karah N, Haldorsen B, Hegstad K, Simonsen GS, Sundsfjord A, Samuelsen O.** 2011. Species identification and molecular characterization of *Acinetobacter* spp. blood culture isolates from Norway. *J Antimicrob Chemother* **66**:738-744.
6. **Yong D, Toleman MA, Giske CG, Cho HS, Sundman K, Lee K, Walsh TR.** 2009. Characterization of a new metallo-beta-lactamase gene, *bla*<sub>NDM-1</sub>, and a novel erythromycin esterase gene carried on a unique genetic structure in *Klebsiella pneumoniae* sequence type 14 from India. *Antimicrob Agents Chemother* **53**:5046-5054.
7. **Hu H, Hu Y, Pan Y, Liang H, Wang H, Wang X, Hao Q, Yang X, Xiao X, Luan C, Yang Y, Cui Y, Yang R, Gao GF, Song Y, Zhu B.** 2012. Novel plasmid and its variant harboring both a *bla*<sub>NDM-1</sub> gene and type IV secretion system in clinical isolates of *Acinetobacter lwoffii*. *Antimicrob Agents Chemother* **56**:1698-1702.
8. **Sun Y, Song Y, Song H, Liu J, Wang P, Qiu S, Chen S, Zhu L, Ji X, Wang Z, Liu N, Xia L, Chen W, Feng S.** 2013. Complete Genome Sequence of an *Acinetobacter* Strain Harboring the NDM-1 Gene. *Genome Announc* **1**:e0002312.
9. **Zhang WJ, Lu Z, Schwarz S, Zhang RM, Wang XM, Si W, Yu S, Chen L, Liu S.** 2013. Complete sequence of the *bla*<sub>NDM-1</sub>-carrying plasmid pNDM-AB from *Acinetobacter baumannii* of food animal origin. *J Antimicrob Chemother* **68**:1681-1682.
10. **Chen Y, Cui Y, Pu F, Jiang G, Zhao X, Yuan Y, Zhao W, Li D, Liu H, Li Y, Liang T, Xu L, Wang Y, Song Q, Yang J, Liang L, Yang R, Han L, Song Y.** 2012. Draft genome sequence of an *Acinetobacter* genomic species 3 strain harboring a *bla*<sub>NDM-1</sub> gene. *J Bacteriol* **194**:204-205.
11. **McGann P, Milillo M, Clifford RJ, Snesrud E, Stevenson L, Backlund MG, Viscount HB, Quintero R, Kwak YI, Zapor MJ, Waterman PE, Lesho EP.** 2013. Detection of New Delhi metallo-beta-lactamase (encoded by *bla*<sub>NDM-1</sub>) in *Acinetobacter schindleri* during routine surveillance. *J Clin Microbiol* **51**:1942-1944.
12. **Bogaerts P, Huang TD, Rezende de Castro R, Bouchahrouf W, Glupczynski Y.** 2013. Could *Acinetobacter pittii* act as an NDM-1 reservoir for Enterobacteriaceae? *J Antimicrob Chemother* **68**:2414-2415.
